# Supplementary material for: Comprehensive Analysis of the mRNA-lncRNA Co-expression Profile and ceRNA Networks Patterns in Chronic Hepatitis B
Source: PubMed Central journal article supplement — Curr Genomics. 2019 May;20(4):231–45. doi: 10.2174/1389202920666190820122126 (PMC6983958; doi:10.2174/1389202920666190820122126), 2019-05
Supplement: CG-20-231_SD1.pdf [file CG-20-231_SD1.pdf]

## Supplementary Material

# Comprehensive Analysis of the mRNA-lncRNA Co-expression Profile and ceRNA Networks Patterns in Chronic Hepatitis B

Wenbiao Chen<sup>1</sup>, Chenhong Lin<sup>1</sup>, Lan Gong<sup>2</sup>, Jianing Chen<sup>1</sup>, Yan Liang<sup>1</sup>, Ping Zeng<sup>1</sup> and Hongyan Diao<sup>1,\*</sup>

<sup>1</sup>State Key Laboratory for Diagnosis and Treatment of Infectious Diseases, Collaborative Innovation Center for Diagnosis and Treatment of Infectious Diseases, The First Affiliated Hospital, College of Medicine, Zhejiang University, Hangzhou, 310003, China; <sup>2</sup>St George and Sutherland Clinical School, University of New South Wales, Sydney NSW 2052, Australia

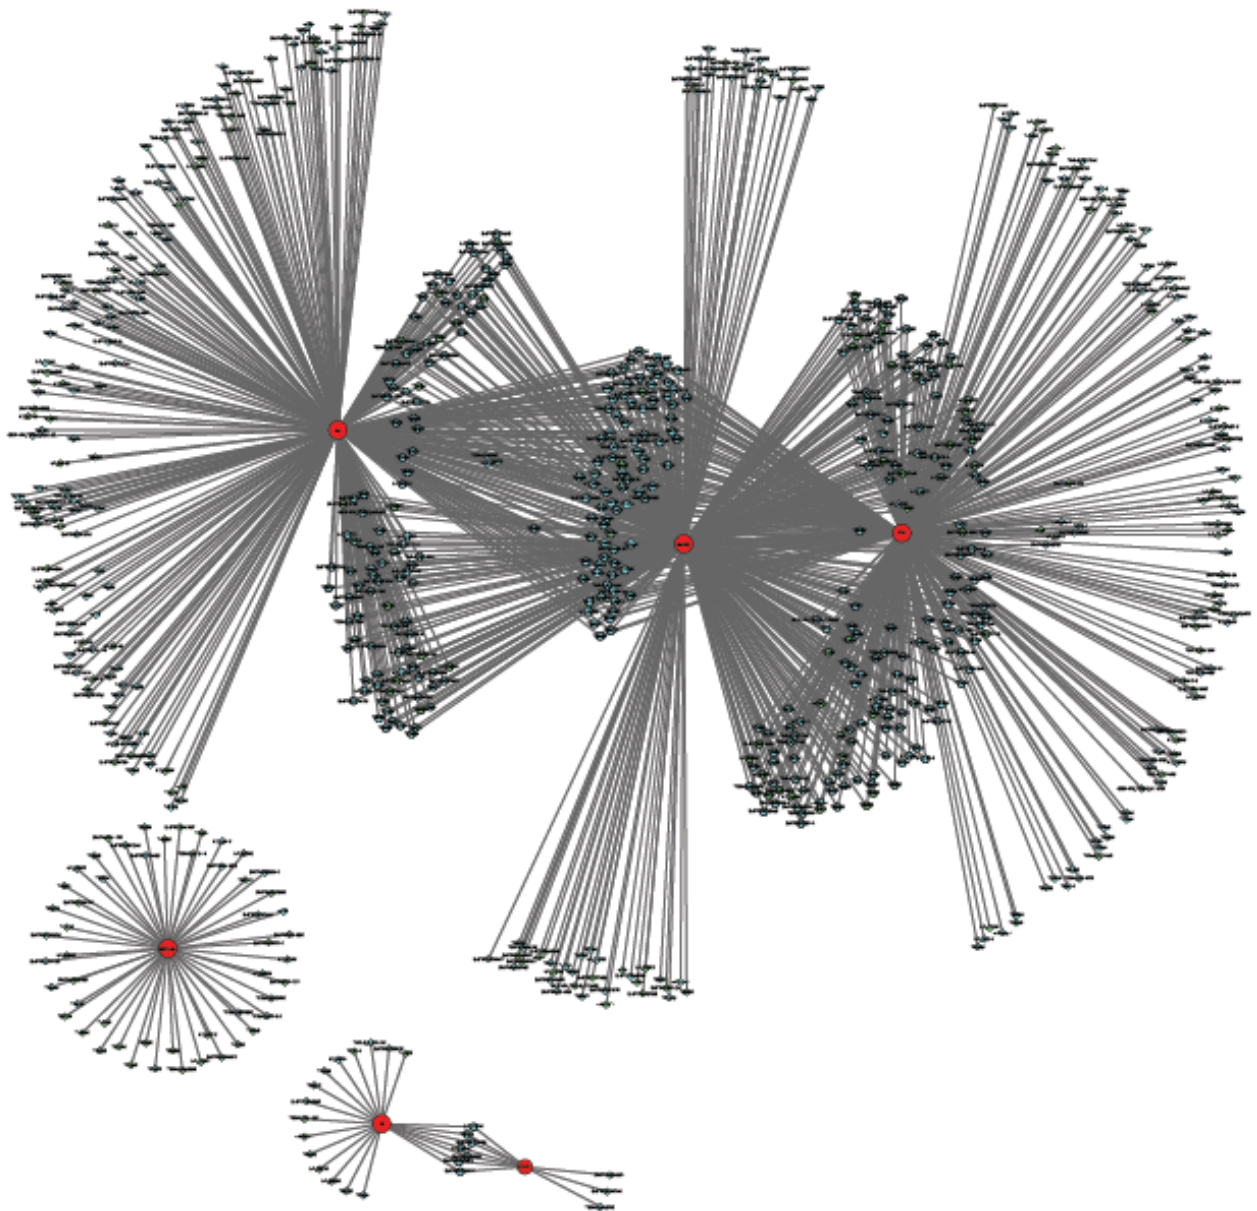

**Fig. (1A).** The co-expression network of complement and coagulation cascades.

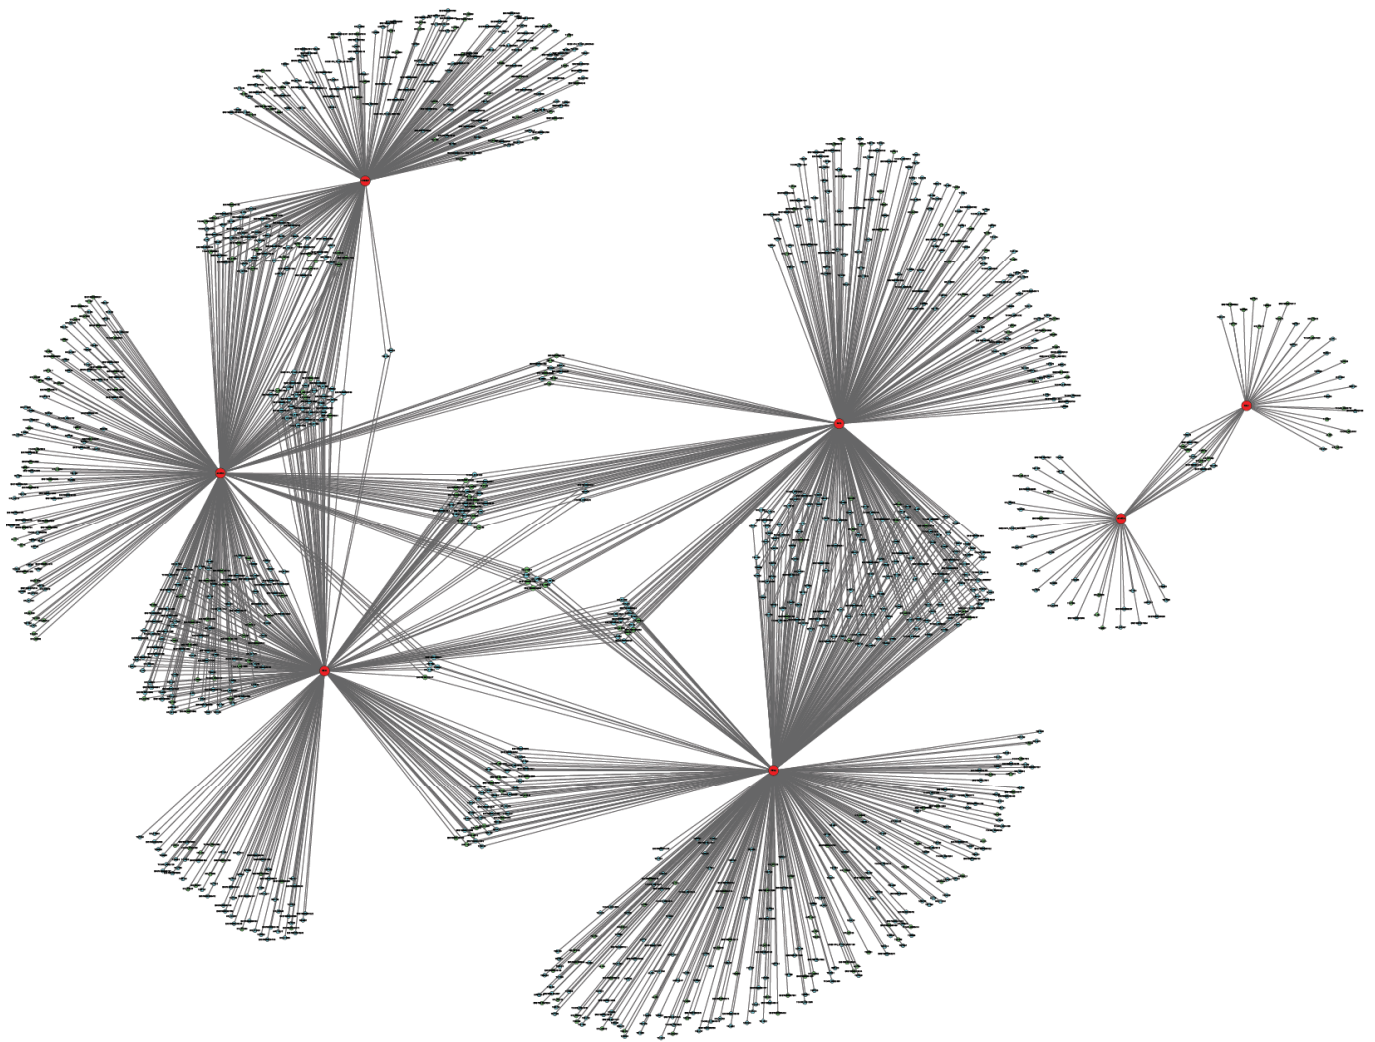

**Fig. (1B).** The co-expression network of TGF- $\beta$  signaling pathway.

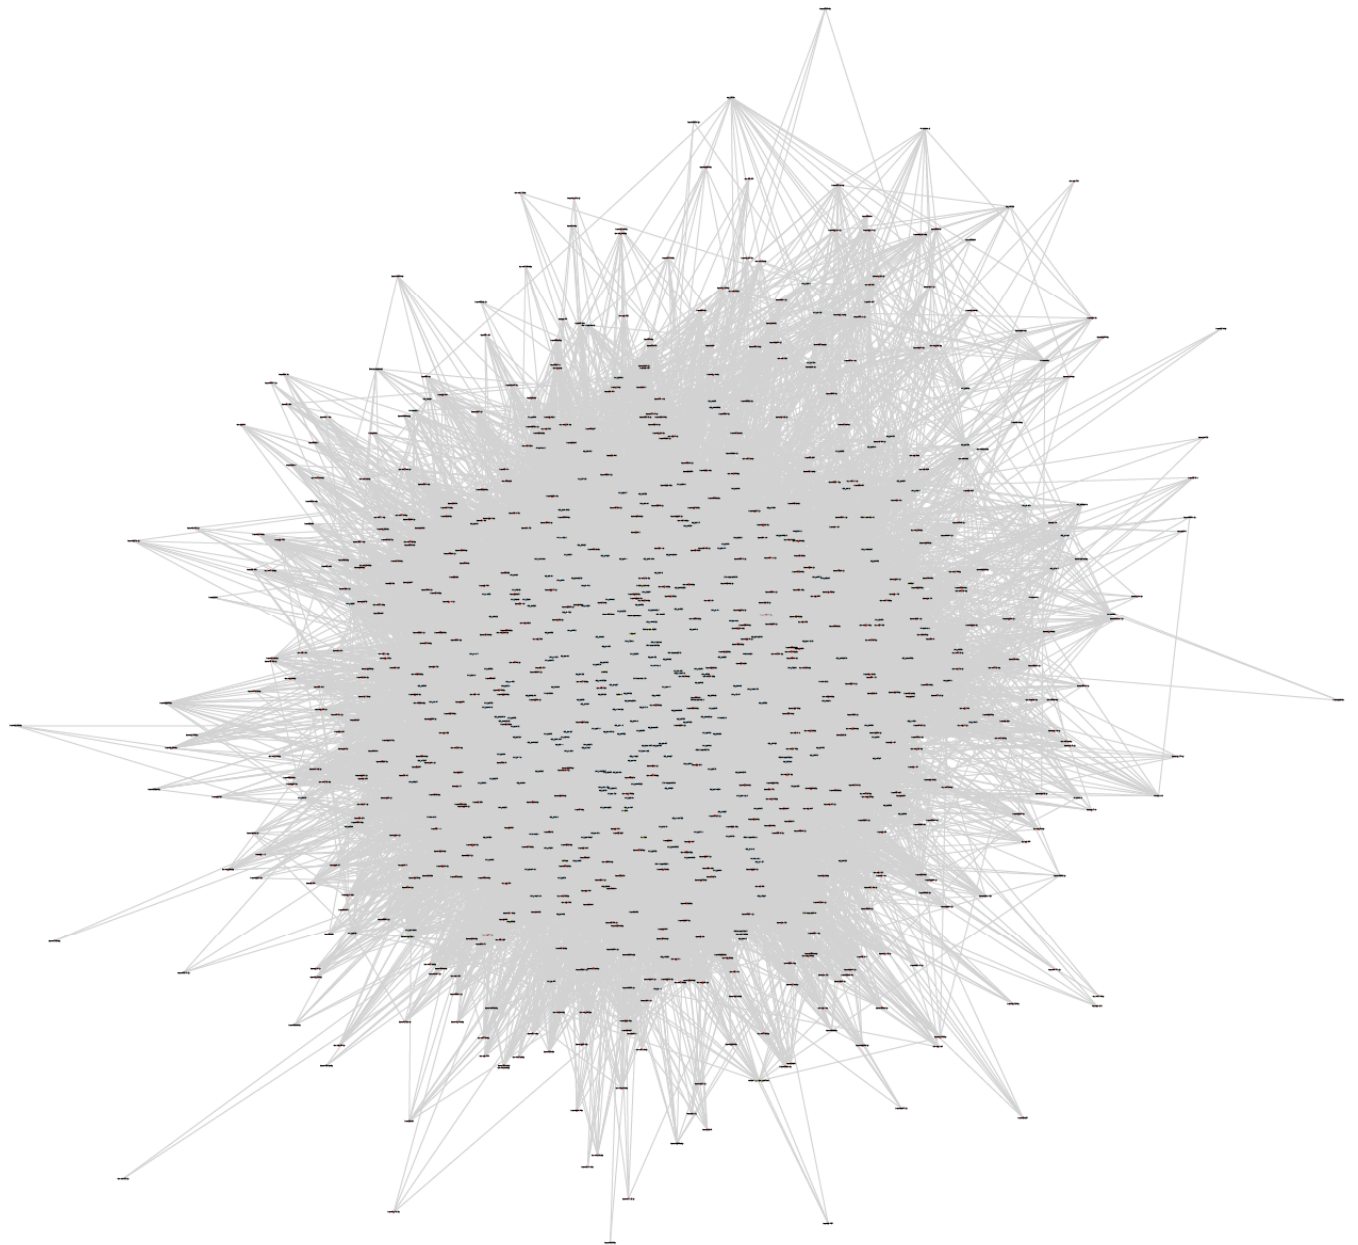

**Fig. (2).** ceRNAs for the top 10 up/downregulated lncRNAs.

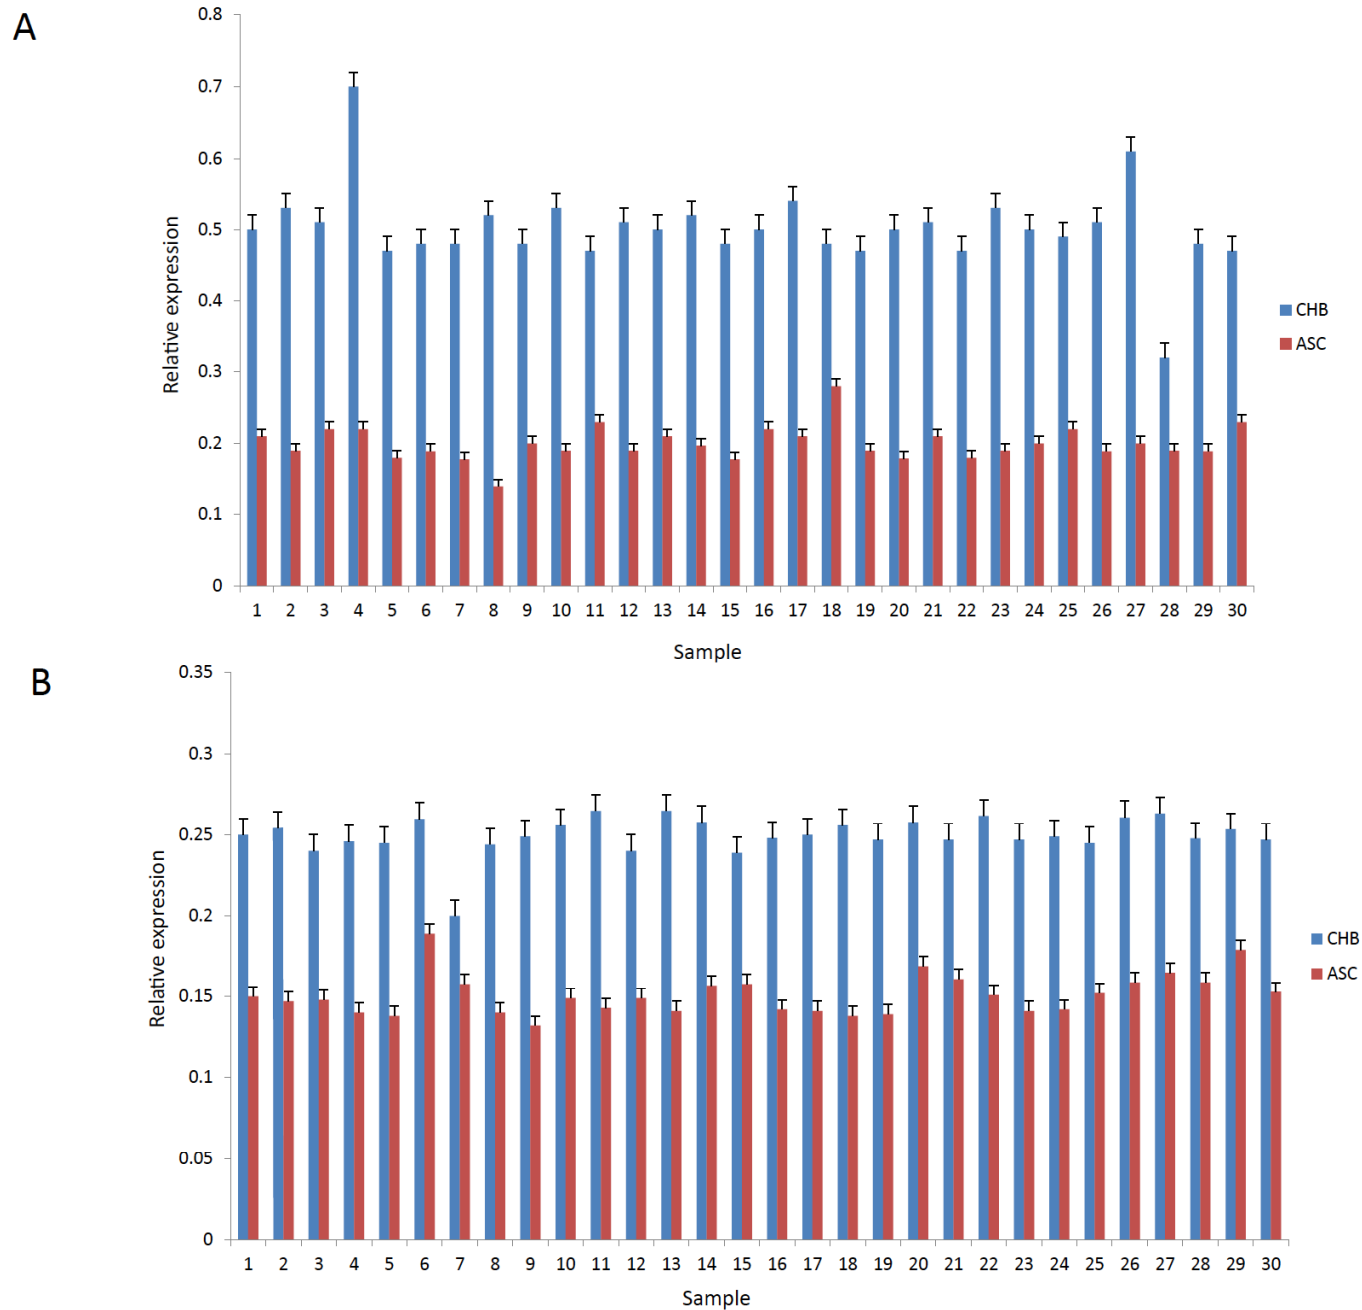

**Fig. (3).** Validation of the expression of *ZFP57* (A) and *T039096* (B) by qRT-PCR in 30 CHB and 30 ASC samples, respectively. Sample 1, 2 and 3 stand for the three CHB and ASC sample, which were used to sequencing analysis.

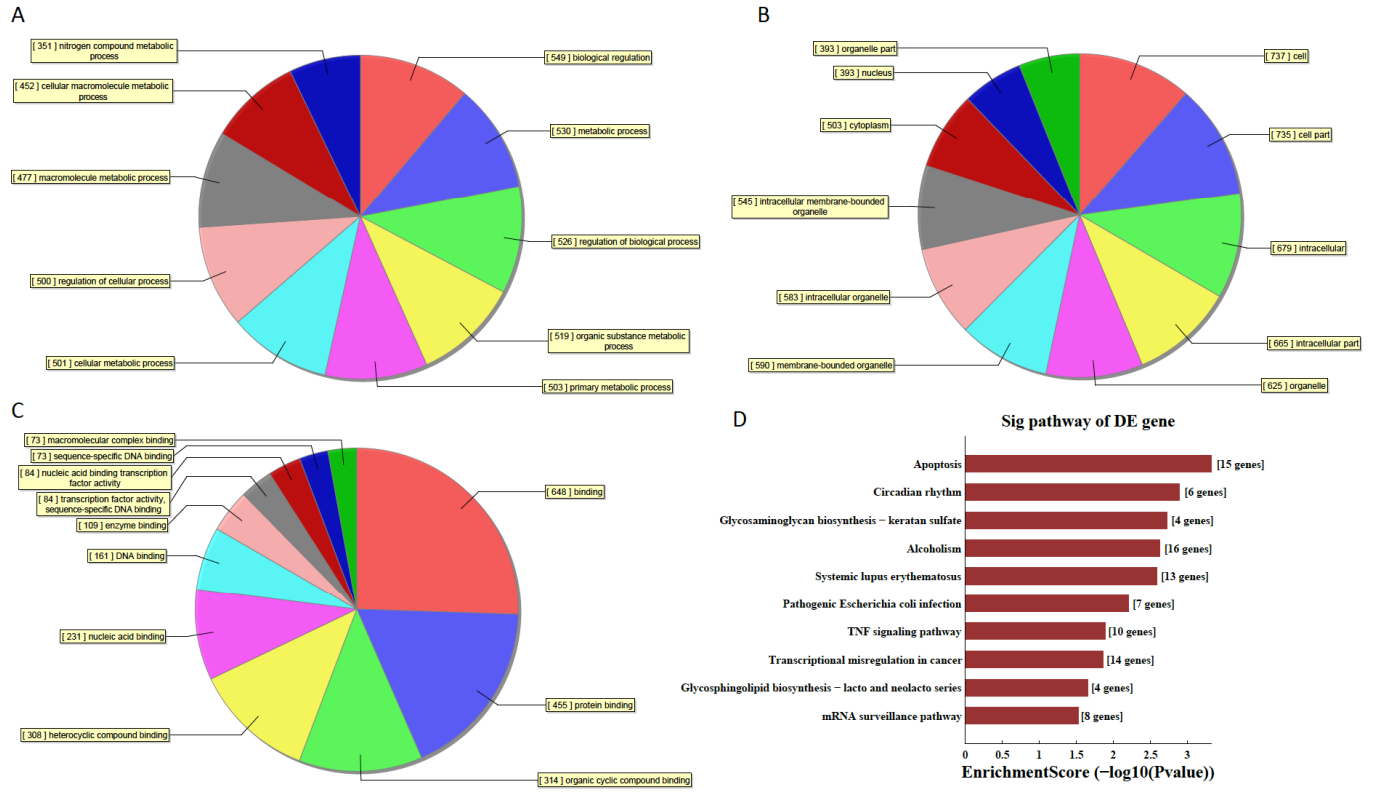

**Fig. (4).** GO and KEGG pathway analyses. Enrichment of biological process (A), cellular component (B) and molecular function (C) in downregulated mRNA. (D) KEGG pathway enrichment analysis of downregulated mRNAs.

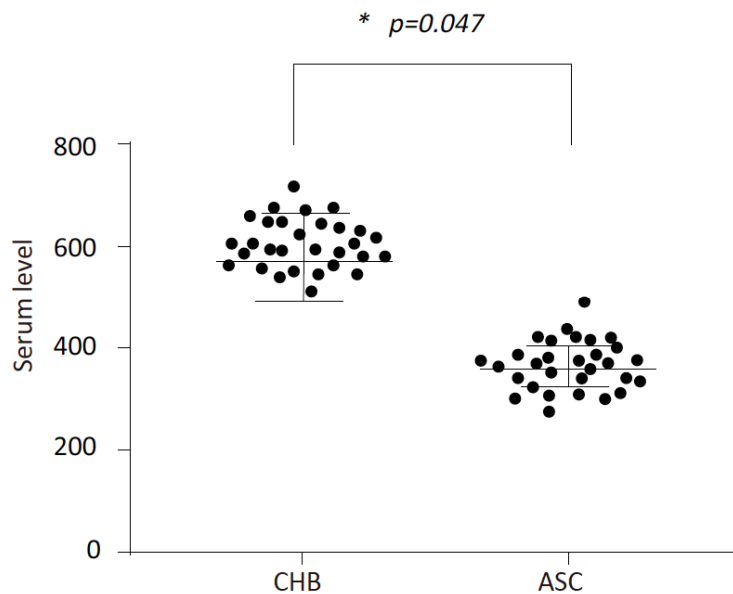

**Fig. (5).** Validation of protein level of ZFP57 by ELISA.

**Table 1. Primers used for the examined mRNAs and lncRNAs.**

|                | Forward Primer       | Reverse Primer        |
|----------------|----------------------|-----------------------|
| <i>T039096</i> | ACACTGGTTTGGCTTGCTGA | ATGTTCAAAGCCCACTTCCCA |
| <i>ZFP57</i>   | TAGCCCCAGGAAGGAATCCA | CTGGCTTCTTCTCACCCGT   |

**Table 2. Correlations between *ZFP57* expression and clinical signature.**

| Characteristics | Number of Patients | M (P <sub>25</sub> , P <sub>75</sub> ) | P     |
|-----------------|--------------------|----------------------------------------|-------|
| HBV-DNA         |                    |                                        | 0.765 |
| >average value  | 8                  | 0.00566 (0.00217, 0.01457)             |       |
| <average value  | 22                 | 0.00385 (0.00126, 0.00640)             |       |
| ALT             |                    |                                        | 0.038 |
| >average value  | 18                 | 0.00393 (0.00105, 0.00531)             |       |
| <average value  | 12                 | 0.00573 (0.00364, 0.01574)             |       |
| AST             |                    |                                        | 0.676 |
| >average value  | 11                 | 0.00535 (0.00431, 0.00674)             |       |
| <average value  | 19                 | 0.00395 (0.00145, 0.01367)             |       |
| TB              |                    |                                        | 0.553 |
| >normal value   | 12                 | 0.00523 (0.00378, 0.03125)             |       |
| <normal value   | 18                 | 0.00463 (0.0030, 0.009656)             |       |
